# Supplementary material for: Achieving high hydrogen evolution reaction activity of a Mo2C monolayer
Source: Royal Society of Chemistry journal article supplement (doi:10.1039/d0cp05053a), 2020-01-01
Supplement: d0cp05053a1.pdf [file d0cp05053a1.pdf]

## Supporting Information

# Achieving High Hydrogen Evolution Reaction Activity of a Mo<sub>2</sub>C Monolayer

Huan Lou<sup>a,b</sup>, Tong Yu<sup>a</sup>, Jiani Ma<sup>a</sup>, Shoutao Zhang<sup>\*a</sup>, Aitor Bergara<sup>\*c,d,e</sup> and Guochun Yang<sup>\*a,b</sup>

<sup>a</sup>Centre for Advanced Optoelectronic Functional Materials Research and Key Laboratory for UV Light-Emitting Materials and Technology of Ministry of Education, Northeast Normal University, Changchun 130024, China

<sup>b</sup>State Key Laboratory of Metastable Materials Science and Technology, Yanshan University, Qinhuangdao 066004, China

<sup>c</sup>Departamento de Física de la Materia Condensada, Universidad del País Vasco-Euskal Herriko Unibertsitatea, UPV/EHU, 48080 Bilbao, Spain

<sup>d</sup>Donostia International Physics Center (DIPC), 20018 Donostia, Spain

<sup>e</sup>Centro de Física de Materiales CFM, Centro Mixto CSIC-UPV/EHU, 20018 Donostia, Spain

\*Corresponding Author Email: zhangst966@nenu.edu.cn; a.bergara@ehu.eus; yanggc468@nenu.edu.cn

| Index                                                                                                                             | Page |
|-----------------------------------------------------------------------------------------------------------------------------------|------|
| 1. Computational details                                                                                                          | 3    |
| 2. Results of the HER activity                                                                                                    | 4    |
| 3. Optimized structures of the pristine and vacancy defects of 1T and 2H phases                                                   | 8    |
| 4. Thermal stability of Mo <sub>2</sub> C with defect by AIMD                                                                     | 9    |
| 5. Calculated Gibbs free energies of different adsorption sites on the pristine and vacancy defect of 1T and 2H phases            | 10   |
| 6. Optimized structures with H coverage on 1T-Mo <sub>2</sub> C monolayer without/with oxygen-termination                         | 11   |
| 7. Thermal stability of Mo <sub>2</sub> C with defect and functionalization by AIMD                                               | 12   |
| 8. Calculated Gibbs free energies as a function of H coverage on Mo defective 1T-Mo <sub>2</sub> C with oxygen functionalization  | 13   |
| 9. Optimized structures of H coverage on 2H-Mo <sub>2</sub> C monolayer without/with oxygen-termination                           | 13   |
| 10. Calculated Gibbs free energies as a function of H coverage on Mo defective 2H-Mo <sub>2</sub> C with oxygen functionalization | 14   |

|                                                                                                                                                                                             |    |
|---------------------------------------------------------------------------------------------------------------------------------------------------------------------------------------------|----|
| <b>11.</b> PDOS of pristine and vacancy defects of Mo <sub>2</sub> C with oxygen functionalization.....                                                                                     | 15 |
| <b>12.</b> Calculated Gibbs free energies of different adsorption sites on 1T- and 2H-Mo <sub>2</sub> C monolayer.....                                                                      | 16 |
| <b>13.</b> Calculated differential Gibbs free energies as a function of H coverage of 1T- and 2H-Mo <sub>2</sub> C monolayer with/without vacancy defects and oxygen functionalization..... | 17 |
| <b>14.</b> References.....                                                                                                                                                                  | 18 |

## Computational details

### 1. Formation energy of vacancy defects on pritrine Mo<sub>2</sub>C monolayer

We calculate the formation energy ( $E_{\text{form}}$ ), defined as

$$E_f = E_D - E_T + \Delta n_i \sum_i \mu_i \quad (1)$$

where  $E_D$  and  $E_T$  are the total energies of a Mo<sub>2</sub>C monolayer with and without defects, respectively.  $\mu_i$  is the chemical potential of atomic species  $i$  ( $i = \text{Mo}$  and  $\text{C}$ ) and  $\Delta n_i$  is the difference of the number of Mo and C atoms between pristine and defective structures.<sup>1,2</sup> To maintain thermodynamic equilibrium (i.e.,  $\mu_{\text{Mo}_2\text{C}} = 2\mu_{\text{Mo}} + \mu_{\text{C}}$ ), the allowed range of  $\mu_{\text{Mo}}$  is  $\mu_{\text{Mo}(\text{bulk})} - \Delta H_f/2 < \mu_{\text{Mo}} < \mu_{\text{Mo}(\text{bulk})}$ , where the upper (lower) limit corresponds to Mo-rich (C-rich) condition and  $\Delta H_f$  is the heat of formation. Here,  $\Delta H_f$  is defined as  $\Delta H_f = E_{\text{Mo}_2\text{C}} - 2E_{\text{Mo}} - E_{\text{C}}$ , where  $E_{\text{Mo}_2\text{C}}$  and  $2E_{\text{Mo}}$  and  $E_{\text{C}}$  are the energies of the Mo<sub>2</sub>C monolayer, Mo and C in bulk, respectively.

The computed  $\Delta H_f$  of 1T and 2H phases are 2.62 and 2.39 eV, respectively.

### 2. Adsorption sites of one hydrogen atom

For the pristine 1T- and 2H-Mo<sub>2</sub>C monolayer, there are three different adsorption sites, i.e. S<sub>1</sub> sits on-top of the Mo atom, S<sub>2</sub> site is above the center of the hexagonal ring and S<sub>3</sub> sits the on-top of a C atom. After removing a C atom, there are six different adsorption sites, in addition to the above three ones, which also includes sites S<sub>v</sub> (on-top site of a vacant atom), which is surrounded by a hexagonal ring center and two different carbon atom sites, S<sub>4</sub> and S<sub>5</sub>. On the other hand, after removing a Mo atom, there are two different types of carbon atoms around a Mo vacancy, i.e. sites S<sub>4</sub> and S<sub>6</sub> (Figures S1c and d).

For the pristine 1T phase, one hydrogen atom is adsorbed on site S<sub>1</sub> with best  $\Delta G_H$  of 0.007 eV. For VMoS-1T, the most favorable hydrogen adsorption site is S<sub>6</sub> with closer to 0.0 eV  $\Delta G_H$  of 0.40 eV, while one hydrogen atom is adsorbed on site S<sub>1</sub> or S<sub>v</sub>, and the atom moves to sites S<sub>3</sub> or S<sub>6</sub> after optimization. For PMoS-1T, the most favorable hydrogen adsorption site is S<sub>3</sub>, with a  $\Delta G_H$  of -0.40 eV. After optimization, the adsorption of hydrogen atom moves from site S<sub>1</sub> to S<sub>4</sub>. For V<sub>C</sub>-1T, the most

favorable hydrogen adsorption site is also S<sub>3</sub>, with a  $\Delta G_H$  of -0.55 eV. After optimization, the hydrogen atom cannot be stabilized at site S<sub>1</sub> but moves to site S<sub>5</sub>.

For the pristine 2H phase, the hydrogen most favorable adsorption site is S<sub>3</sub> with a  $\Delta G_H$  of -1.03 eV, while hydrogen atom does not stabilize at site S<sub>1</sub> but moves to S<sub>3</sub>.

As for VMoS-2H, site S<sub>6</sub> is relatively active for hydrogen atom adsorption with  $\Delta G_H$  of 0.70 eV. After optimization, the hydrogen atom can move from site S<sub>1</sub> to S<sub>2</sub>, and from site S<sub>v</sub> to S<sub>6</sub>. For PMoS-2H, the site S<sub>4</sub> is relatively active for hydrogen atom adsorption with  $\Delta G_H$  of -0.79 eV. After optimization, the hydrogen atom moves from site S<sub>1</sub> or S<sub>6</sub> to S<sub>2</sub>, and from site S<sub>v</sub> to S<sub>5</sub>. As for V<sub>C</sub>, site S<sub>3</sub> is relatively active with  $\Delta G_H$  of -1.05 eV. Among hydrogen atom cannot be stabilized on site S<sub>1</sub> and moves to site S<sub>3</sub>.

### 3. Adsorption energy of oxygen atom on Mo<sub>2</sub>C monolayer

In order to quantitatively access the adsorption behaviors, we debate the energetically most favorable adsorption sites of oxygen atoms on Mo<sub>2</sub>C monolayer by calculating the adsorption energies. The adsorption energy, is defined as the difference between the total energy of the system with adsorbed oxygen atoms and the sum of the total energy of  $n$  isolated oxygen atoms and the isolated Mo<sub>2</sub>C monolayer.<sup>3,4</sup> The adsorption energy ( $E_{ad}$ ) is calculated as below:

$$E_{ad} = E_{O@Mo_2C} - E_{Mo_2C} - \frac{n}{2}E(O_2) \quad (5)$$

where  $E_{Mo_2C}$  and  $E_{O@Mo_2C}$  represent the total energy of a Mo<sub>2</sub>C monolayer and  $n$  O atoms adsorbed on the Mo<sub>2</sub>C monolayer, respectively. A negative value of the adsorption energy indicates that the composite structure of the oxygen atoms adsorbed on the Mo<sub>2</sub>C monolayer is more stable.

For 1T phase, the most favorable oxygen adsorption site is S<sub>3</sub> for the pristine and V<sub>C</sub> monolayers, while site S<sub>2</sub> for VMoS-V<sub>Mo</sub>CO<sub>2</sub>-1T and PMoS-V<sub>Mo</sub>CO<sub>2</sub>-1T. Among the interaction between oxygen atom and the basal is weaker in the V<sub>Mo</sub>CO<sub>2</sub>-1T monolayer than in Mo<sub>2</sub>CO<sub>2</sub>-1T and V<sub>C</sub>CO<sub>2</sub>-1T with difference of adsorption energies of 0.47 and 0.38 eV/atom, respectively. For the 2H phase, both on the pristine and basal planes with vacancy defects, the oxygen atoms adsorbed on site S<sub>3</sub> is the most stable configuration. Similar to the 1T phase, the interaction between oxygen atoms and the basal plane is weaker in the V<sub>Mo</sub>CO<sub>2</sub>-2H monolayer than that in other basal planes with difference of adsorption energies of 0.31 and 0.27 eV/atom, respectively.

## Results of the HER activity

## 1. Strain effect of P<sub>MoS</sub>-V<sub>M<sub>0</sub></sub>CO<sub>2</sub>-1T and V<sub>C</sub>CO<sub>2</sub>-1T on the HER activity

For P<sub>MoS</sub>-V<sub>M<sub>0</sub></sub>CO<sub>2</sub>-1T,  $d-\Delta G_H$  values range from -0.34 to 0.10 eV at hydrogen coverages of 1/9 to 7/9, and can be tuned into the free energy range from -0.40 eV to 0.20 eV through a 4% compression and stretching (Figure 3g). Both the catalytic activity of P<sub>MoS</sub>-V<sub>M<sub>0</sub></sub>CO<sub>2</sub>-1T can be improved at a coverage of 2/9 through compressive strain from -3% to -4% with a  $d-\Delta G_H$  of -0.016 and -0.0007 eV. At a coverage of 5/9, the  $d-\Delta G_H$  value can be reduced to -0.01 and 0.003 eV through compression and stretching of  $\pm 4\%$ . For other hydrogen coverages, by applying strain,  $d-\Delta G_H$  values decrease at  $\theta = 1/9, 3/9$  and  $6/9$ , and increase at  $\theta = 4/9$  and  $7/9$ , which is in the window of  $\pm 0.4$  eV. The range of  $a-\Delta G_H$  values is from -0.09 to 0.07 eV, adjusted from -0.22 eV to 0.06 eV after applying strain, which makes  $a-\Delta G_H$  more negative than without strain (Figure 3h).

For V<sub>C</sub>CO<sub>2</sub>-1T, by applying the appropriate strain, the  $d-\Delta G_H$  values are basically unchanged at hydrogen coverages from 1/9 to 3/9, with  $d-\Delta G_H$  values from -0.40 to 0.30 eV (Figure 3i). When the suitable strain is applied, the values of  $d-\Delta G_H$  with coverages of 2/9 and 3/9 are closer to 0.0 eV, especially with a strain of  $\pm 4\%$  at a coverage of 2/9 with 0.03 eV.  $d-\Delta G_H$  values are slightly reduced at  $\theta = 3/9$  through 4% compression and stretching. At a 5/9 coverage, the  $d-\Delta G_H$  can reduce to 0.38 and 0.44 eV under compression and stretching of  $\pm 4\%$ , respectively, while the HER activity cannot be improved at  $\theta = 1/9$  and  $4/9$  under 4% compression and stretching. For the average process, the strain effect on  $a-\Delta G_H$  value is small (ranging from -0.13 to 0.24 eV without strain and from -0.17 to 0.24 eV upon strain (Figure 3j).

## 2. The HER activity of the pristine and defective 2H-Mo<sub>2</sub>C monolayer

The HER activity of catalyst is closely related to the reaction Gibbs free energy of hydrogen adsorption ( $\Delta G_H$ ), and the ideal  $\Delta G_H$  value is close to zero, and defined as the H\* adsorption sites with  $|\Delta G_H| < 0.40$  eV.<sup>5</sup> Meanwhile,  $\Delta G_H$  is closely correlated

with hydrogen coverages.<sup>6-8</sup> Similar to the 1T structure, the 2H phase of a Mo<sub>2</sub>C monolayer has three inequivalent adsorption sites (Figure 1) for H atoms. In more detail, S<sub>1</sub> sits on-top of a Mo atom, S<sub>2</sub> is above the center of the hexagonal ring, and S<sub>3</sub> sits on-top of a C atom. There are two stable H adsorption sites after optimization, such as sites S<sub>2</sub> and S<sub>3</sub> (Figure 1b), and site S<sub>3</sub> is relatively active with a  $\Delta G_H$  of -1.03 eV (Table S1).

Then, we calculate the average process (a- $\Delta G_H$ ) and individual process (d- $\Delta G_H$ ) with hydrogen coverages ( $\theta$ ) ranging from 1/9 to 4/9, as shown in Figures 4a and b. In the individual process, the best d- $\Delta G_H$  value is -0.73 eV at a hydrogen coverage of 4/9. With increasing the hydrogen coverage, d- $\Delta G_H$  values gradually increase, but still are more negative. In the collective process, the best a- $\Delta G_H$  value is -0.86 eV at a hydrogen coverage of 4/9. a- $\Delta G_H$  values gradually increase by increasing the hydrogen coverage, similar to the d- $\Delta G_H$ . Thus, d- $\Delta G_H$  and a- $\Delta G_H$  values are out of the window of  $\pm 0.40$  eV, though the 2H phase is more energetically stable, it has a poor HER activity, as demonstrated in previous study.<sup>9</sup>

Subsequently, we explore the effect of Mo and C vacancy on the HER activity of the 2H phase. As observed in the 1T phase, there are two independent surfaces (i.e. VMoS-2H and PMoS-2H). For VMoS-2H, five possible adsorption sites for hydrogen atoms are considered (Figure 1d, Figure S4d, and Table S1). Its most favorable hydrogen adsorption site is on the C atom (S<sub>6</sub> site), similar to VMoS-1T. The Gibbs free energy related to hydrogen coverages ( $\theta$ ) ranging from 1/9 to 4/9 are listed in Table S4. As shown in Figures 4a and b, the best d- $\Delta G_H$  and a- $\Delta G_H$  values are -0.42 and -0.64 eV, respectively, at a hydrogen coverage of 4/9. Both d- $\Delta G_H$  and a- $\Delta G_H$  values are far from the accepted window of  $\pm 0.40$  eV. Compared with pristine 2H-Mo<sub>2</sub>C, the incorporation of Mo vacancy strengthens the HER activity, which may be due to the appearance of dangling bonds.

For PMoS-2H, all possible adsorption sites of hydrogen atoms are considered (Figure 1d, Figure S4f, and Table S1). The most favorable hydrogen adsorption site is on the C atom (S<sub>4</sub> site). The calculated Gibbs free energy of hydrogen adsorption with coverages ( $\theta$ ) from 1/9 to 4/9 can be found in Table S4. In the individual process (Figure 4a), the best d- $\Delta G_H$  is -0.18 eV at a hydrogen coverage of 2/9, indicating a

good HER activity on PMoS-2H. At other hydrogen coverages,  $d\text{-}\Delta G_H$  values are outside the energy window of  $\pm 0.40$  eV. In the average process (Figure 4b), the best  $a\text{-}\Delta G_H$  value is -0.49 eV at a hydrogen coverage of 2/9. Based on the analysis above, the HER activity of the individual process is superior to that of the average process. Compared with VMoS-2H, PMoS-2H shows a better HER activity in the individual and collective processes.

Five possible adsorption sites for hydrogen atoms are also considered for  $V_C$  (Figure 1f, Figure S4h, and Table S1). We calculate  $d\text{-}\Delta G_H$  and  $a\text{-}\Delta G_H$  with hydrogen coverages ( $\theta$ ) ranging from 1/9 to 4/9 (Figure S10c and Table S4). In the individual process (Figure 4a), the best  $d\text{-}\Delta G_H$  value is -0.60 eV at a hydrogen coverage of 4/9.  $a\text{-}\Delta G_H$  values at hydrogen coverages from 1/9 to 4/9 are less than -1.00 eV (Figure 4b). Thus, the incorporation of C vacancies does not improve the HER activity of the 2H phase.

### 3. The HER activity of 2H-Mo<sub>2</sub>C monolayer with oxygen functionalization

The HER activity of the pristine and defective 2H-Mo<sub>2</sub>C with oxygen functionalization were considered (Figure S11), which is named as Mo<sub>2</sub>CO<sub>2</sub>-2H, VMoS-V<sub>Mo</sub>CO<sub>2</sub>-2H, PMoS-V<sub>Mo</sub>CO<sub>2</sub>-2H, and  $V_C$ CO<sub>2</sub>-2H. For 2H-Mo<sub>2</sub>C, similar to the 1T phase, there are also three possible adsorption sites for oxygen atoms (i.e. sites S<sub>1</sub>, S<sub>2</sub>, and S<sub>3</sub>, Figure 1b). After fully relaxed the structure, the most favorable O adsorption site both for pristine and for the basal planes of the 2H phase with vacancy defects is S<sub>3</sub>.

For Mo<sub>2</sub>CO<sub>2</sub>-2H, we calculated the  $d\text{-}\Delta G_H$  and  $a\text{-}\Delta G_H$  with hydrogen coverages ( $\theta$ ) ranging from 1/9 to 5/9 (Table S5). In the individual process (Figures 4c), the best  $d\text{-}\Delta G_H$  is 0.06 eV at a hydrogen coverage of 2/9. With increasing hydrogen coverages, the interaction between hydrogen atoms and Mo<sub>2</sub>CO<sub>2</sub>-2H becomes weaker with  $d\text{-}\Delta G_H$  ranging from -0.48 to 1.67 eV, which is out of the accepted window of  $\pm 0.40$  eV. In the average process (Figures 4d), the best  $a\text{-}\Delta G_H$  is 0.11 eV at a hydrogen coverage of 3/9. With increasing hydrogen coverages, the interaction between hydrogen atoms and Mo<sub>2</sub>CO<sub>2</sub>-2H also becomes weaker with a  $a\text{-}\Delta G_H$  ranging from -0.21 to 0.73 eV at  $\theta = 2/9, 3/9, 4/9$  and  $5/9$ . The resulting catalytic activity of the 2H phase is enhanced by oxygen functionalization.

For VMoS-V<sub>Mo</sub>CO<sub>2</sub>-2H, the maximum absorbed hydrogen has been greatly enhanced, and hydrogen coverages ( $\theta$ ) ranging from 1/9 to 9/9 are studied (Figure S11b and Table S5). In the individual process (Figure S12a), there appear more ideal Gibbs free energy values of hydrogen adsorption (i.e. -0.19, -0.15, 0.18, 0.005, 0.24, -0.05 and 0.22 eV at  $\theta = 1/9, 2/9, 3/9, 4/9, 5/9, 6/9,$  and  $7/9$ , respectively), indicating VMoS-V<sub>Mo</sub>CO<sub>2</sub>-2H possesses an excellent HER activity in a wide H coverage. In the average process (Figure S12b), the best a- $\Delta G_H$  is 0.0 eV at a hydrogen coverage of 6/9. The values of a- $\Delta G_H$  range from -0.17 to 0.19 eV at hydrogen coverages from 2/9 to 8/9, and a- $\Delta G_H$  values reach to 0.43 eV at a fully hydrogen coverage. Therefore, VMoS-V<sub>Mo</sub>CO<sub>2</sub>-2H exhibits an excellent HER activity in both individual and collective processes, and is much superior to pristine and defective 2H-Mo<sub>2</sub>C.

For PMoS-V<sub>Mo</sub>CO<sub>2</sub>-2H, d- $\Delta G_H$  and a- $\Delta G_H$  values are calculated with hydrogen coverages ( $\theta$ ) of 1/9 to 5/9 (Figure S11d and Table S5). In the individual process (Figure 4c), the best d- $\Delta G_H$  is 0.18 eV at a hydrogen coverage of 2/9. With increasing hydrogen coverages, the interaction between hydrogen atom and PMoS-V<sub>Mo</sub>CO<sub>2</sub>-2H becomes weaker, with d- $\Delta G_H$  ranging from -0.32 to 1.09 eV, which is out of the accepted window of  $\pm 0.40$  eV. In the average process (Figures 4d), the best a- $\Delta G_H$  is 0.04 eV at a hydrogen coverage of 3/9. With increasing hydrogen coverages, the interaction between hydrogen atoms and PMoS-V<sub>Mo</sub>CO<sub>2</sub>-2H also becomes weaker with a- $\Delta G_H$  changing from -0.07 to 0.41 eV at  $\theta = 2/9$  to  $5/9$ . Thus, PMoS-V<sub>Mo</sub>CO<sub>2</sub>-2H shows an excellent HER activity in the collective process. Therefore, incorporation of Mo vacancies and oxygen functionalization are the effective way to enhance the HER activity of 2H-Mo<sub>2</sub>C, and VMoS-V<sub>Mo</sub>CO<sub>2</sub>-2H shows an excellent HER activity both in the individual and collective processes with a wide hydrogen coverage.

For V<sub>C</sub>CO<sub>2</sub>-2H, we investigated the corresponding d- $\Delta G_H$  and a- $\Delta G_H$  at different hydrogen coverages ( $\theta$ ) from 1/9 to 5/9 (Figure S11c and Table S5). In the individual process (Figure 4c), the d- $\Delta G_H$  values are -0.34, 0.05, 0.26 and -0.13 eV at  $\theta = 1/9, 2/9, 3/9,$  and  $4/9$ , respectively, indicating that V<sub>C</sub>CO<sub>2</sub>-2H has a good HER activity. In the average process (Figure 4d), the a- $\Delta G_H$  values are -0.14, -0.009, -0.04 and -0.23 eV at  $\theta = 2/9, 3/9, 4/9,$  and  $5/9$ , respectively, indicating that V<sub>C</sub>CO<sub>2</sub>-2H shows an improved HER activity with respect to V<sub>C</sub>-2H. In other words, oxygen functionalization is able to enhance the HER activity of 2H-Mo<sub>2</sub>C with C vacancies.



However, the HER activity of  $V_CCO_2-2H$  is much weaker than that of  $VMoS-V_{Mo}CO_2-2H$ .

## **Supporting Figures**

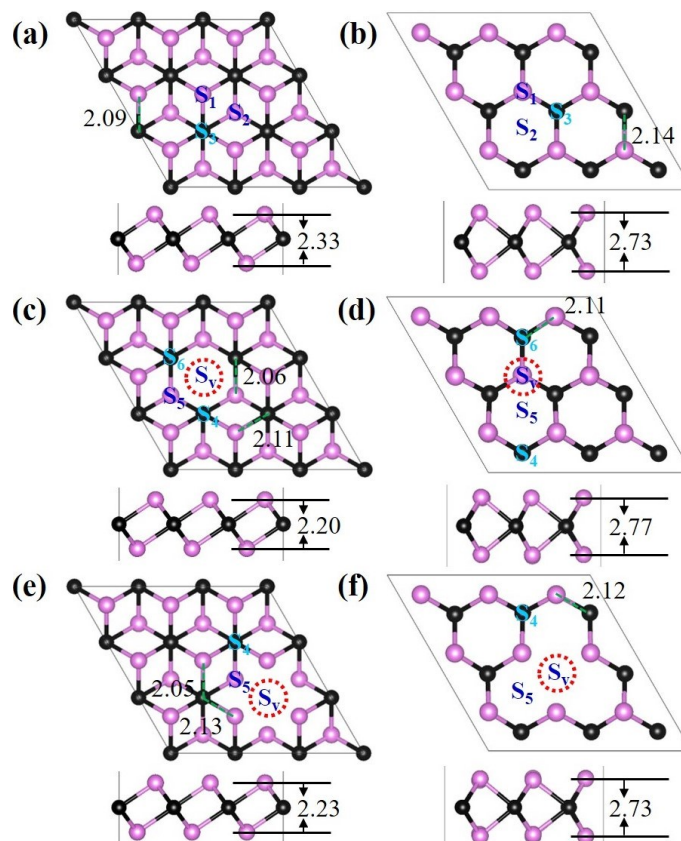

**Figure S1.** The optimized structures and the potential adsorption sites of the pristine and vacancy defects of 1T and 2H phases of  $\text{Mo}_2\text{C}$ . (a) and (b) are the pristine structures of 1T and 2H phases. (c) and (d) are the structures with  $V_{\text{Mo}}$ . (e) and (f) are for  $V_{\text{C}}$  ones. Light violet and black balls represent Mo and C atoms, respectively. Sites  $S_1$ ,  $S_2$  and  $S_3$  are located on-top of a Mo atom, the center of the hexagonal ring and on-top of a C atom, respectively. The defect site is denoted as  $S_v$ , which is surrounded by a hexagonal ring center and two different carbon atom sites,  $S_4$  and  $S_5$ .

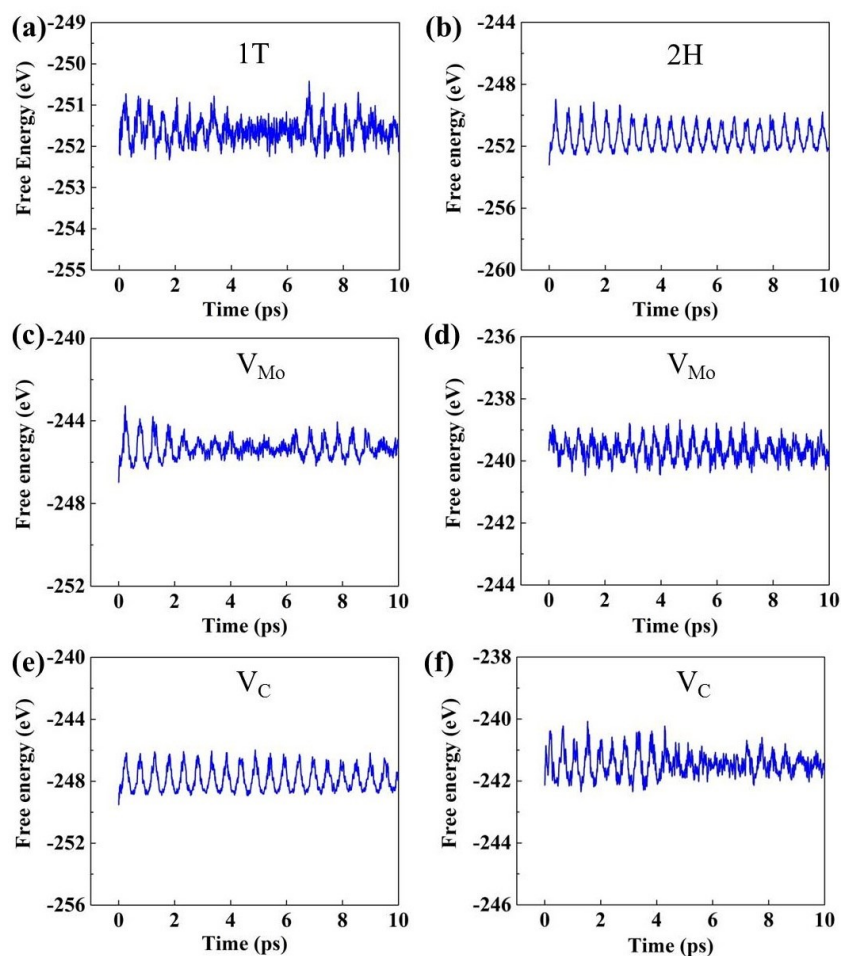

**Figure S2.** Total potential energy as a function of MD time at a temperature of 500 K.

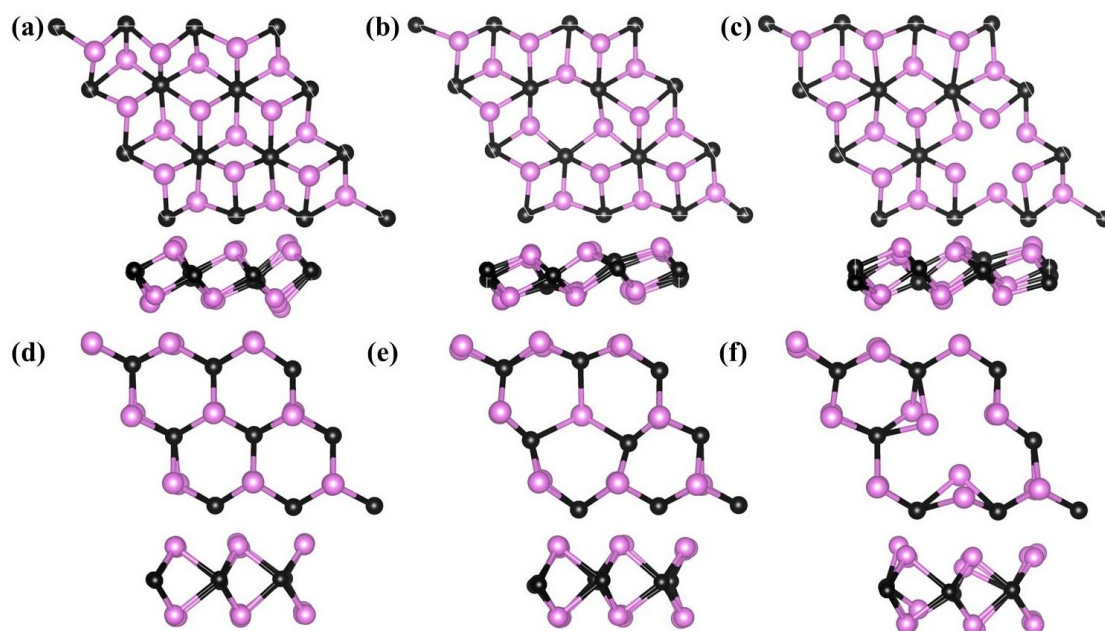

**Figure S3.** Snapshots of the final frame of  $\text{Mo}_2\text{C}$  monolayers at time of 10 ps during AIMD simulations under the temperatures of 500 K, (a-c)pristine,  $V_{\text{Mo}}$  and  $V_{\text{C}}$  of 1T phase, respectively, (d-f) pristine,  $V_{\text{Mo}}$  and  $V_{\text{C}}$  of 2H phase, respectively.

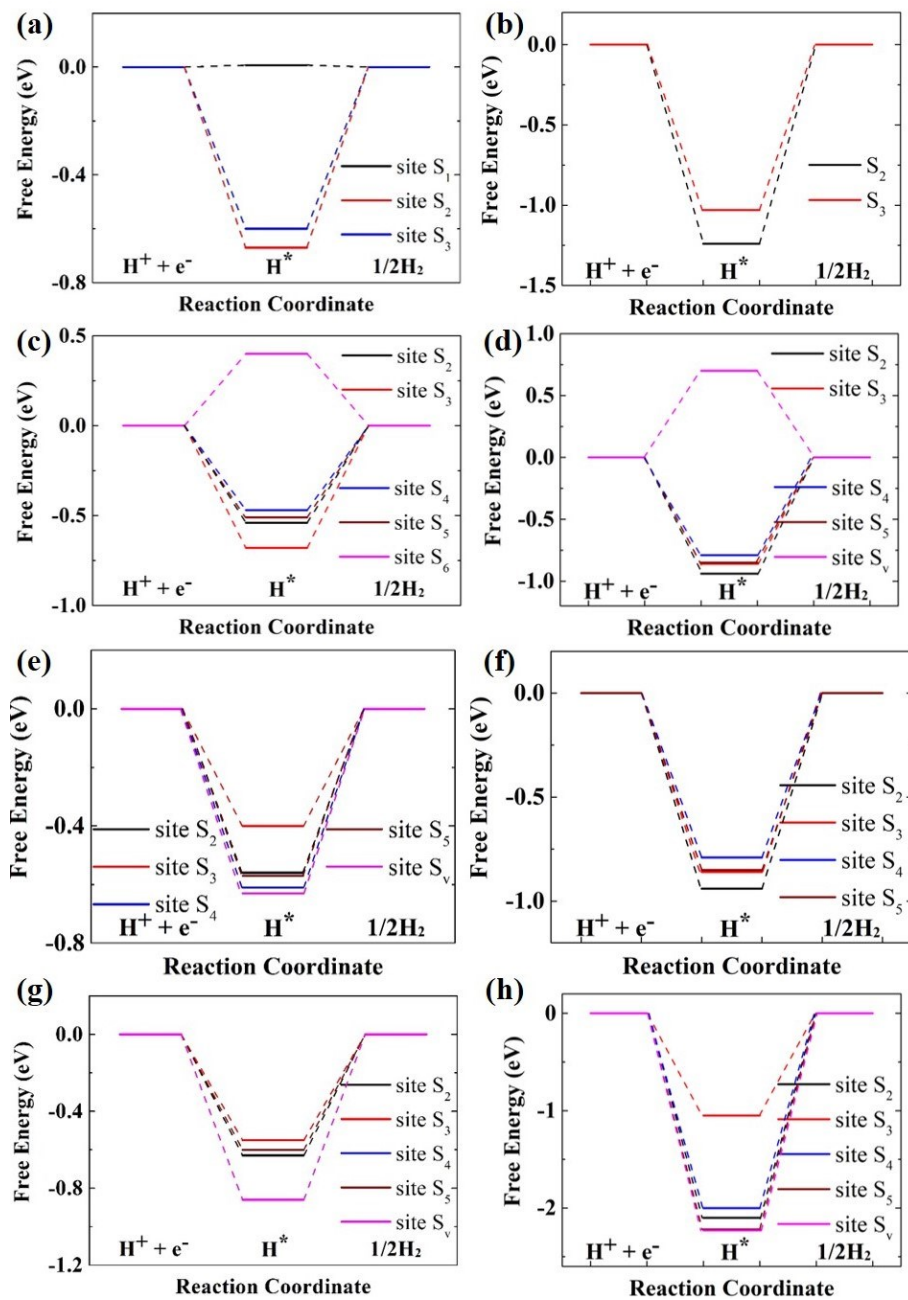

**Figure S4.** Calculated Gibbs free energies of different adsorption sites on the pristine and vacancy defect of 1T- (left) and 2H- (right) Mo<sub>2</sub>C monolayers with vacancy defects: (a, b) pristine, (c, d) VMoS, (e, f) PMoS, and (g, h) V<sub>C</sub>. For PMoS of 1T phase, it only shows the free energy of site S<sub>4</sub> because hydrogen atoms adsorbed on sites S<sub>4</sub> and S<sub>6</sub> have the same value of  $\Delta G_H$ .

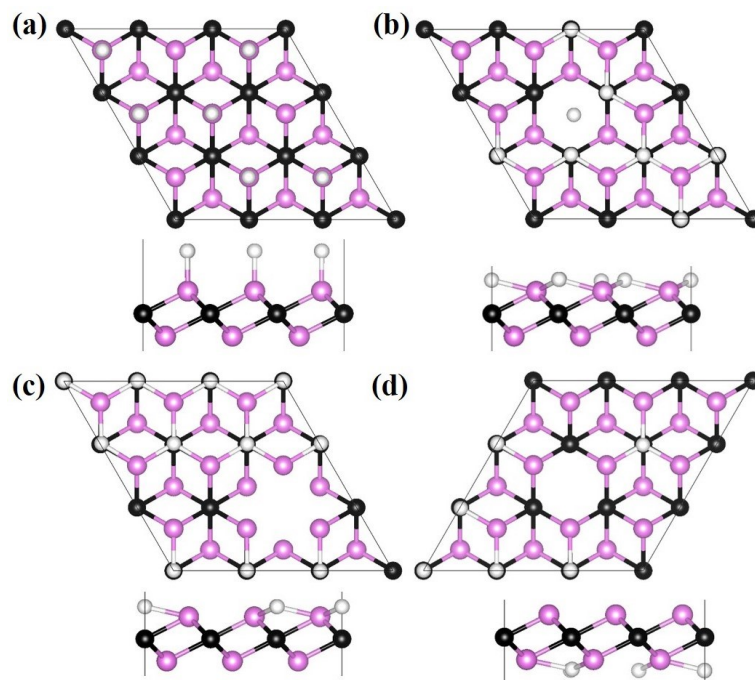

**Figure S5.** Optimized structures on pristine and vacancy defects of 1T-Mo<sub>2</sub>C monolayer with H coverage, (a) pristine, (b) VMoS-1T, (c) V<sub>C</sub> and (d) PMoST-1T. Light purple, black and light grey balls represent Mo, C and H atoms, respectively.

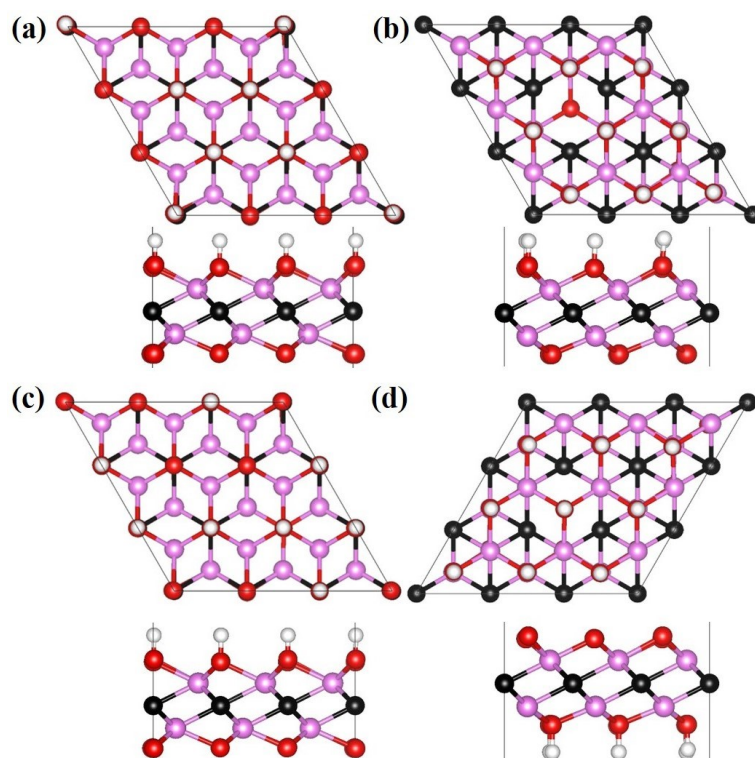

**Figure S6.** Optimized structures of pristine and oxygen-terminated 1T-Mo<sub>2</sub>C monolayer with vacancy defects and H coverage: (a) pristine, (b) VMoS-1T, (c) V<sub>C</sub> and (d) PMoST-1T. Light purple, black, red and light grey balls represent Mo, C, O and H atoms, respectively.

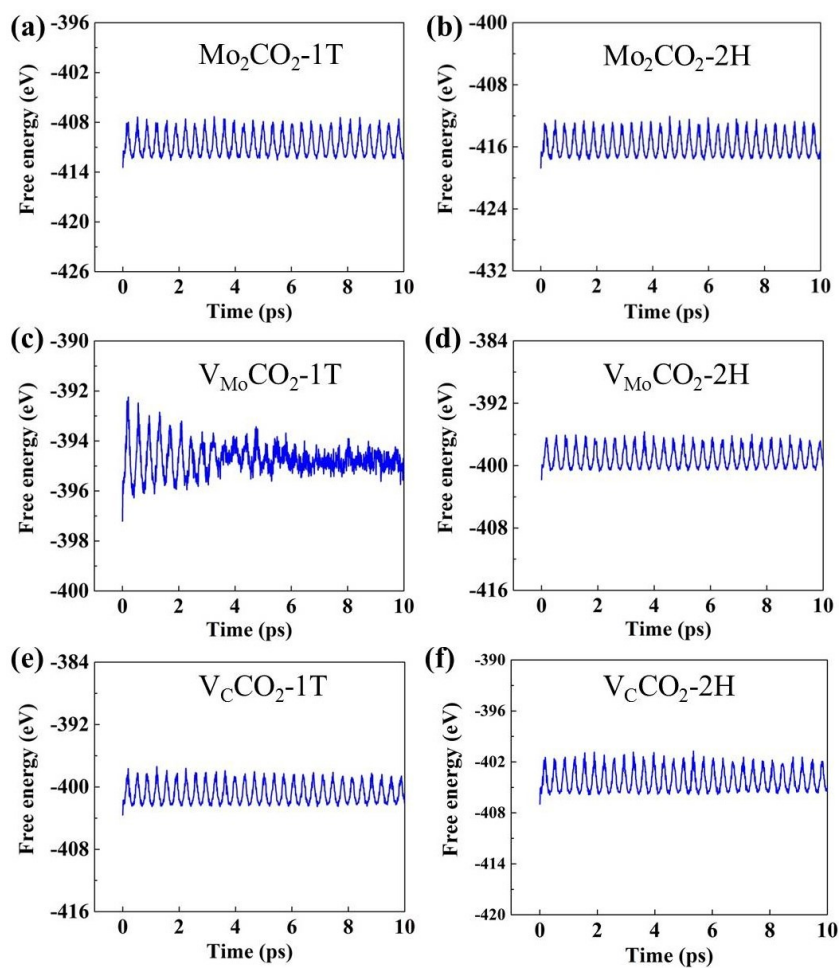

**Figure S7.** Total potential energy as a function of MD time at a temperature of 500 K.

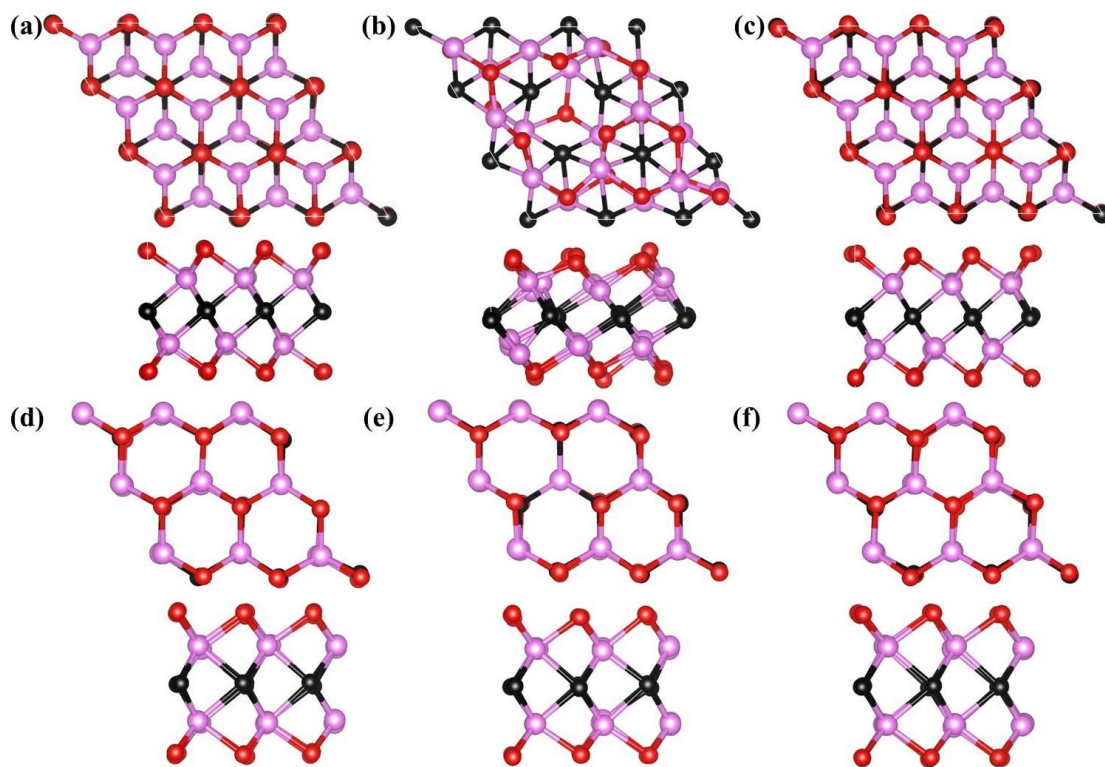

**Figure S8.** Snapshots of the final frame of Mo<sub>2</sub>C monolayers with oxygen functionalization at time of 10 ps during AIMD simulations under the temperatures of 500 K, (a) Mo<sub>2</sub>CO<sub>2</sub>-1T, (b) V<sub>Mo</sub>CO<sub>2</sub>-1T, (c) V<sub>C</sub>CO<sub>2</sub>-1T, (d) Mo<sub>2</sub>CO<sub>2</sub>-2H, (e) V<sub>Mo</sub>CO<sub>2</sub>-2H, (f) V<sub>C</sub>CO<sub>2</sub>-2H.

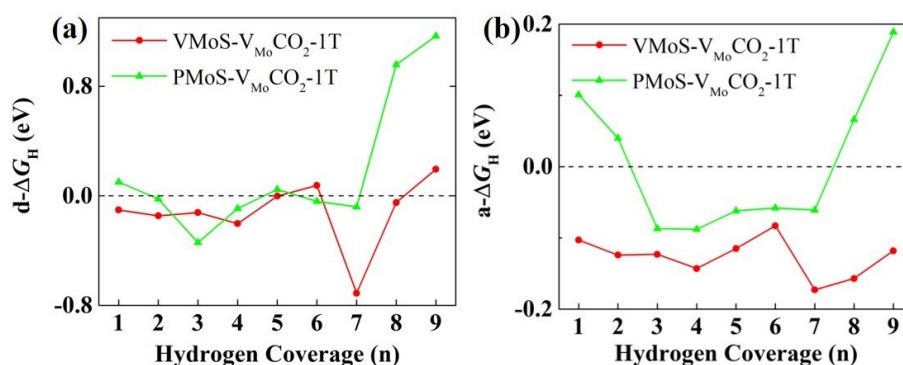

**Figure S9.** Calculated differential Gibbs free energies as a function of H coverage of Mo defective 1T-Mo<sub>2</sub>C with oxygen functionalization: (a) d-ΔG<sub>H</sub> and (b) a-ΔG<sub>H</sub>.

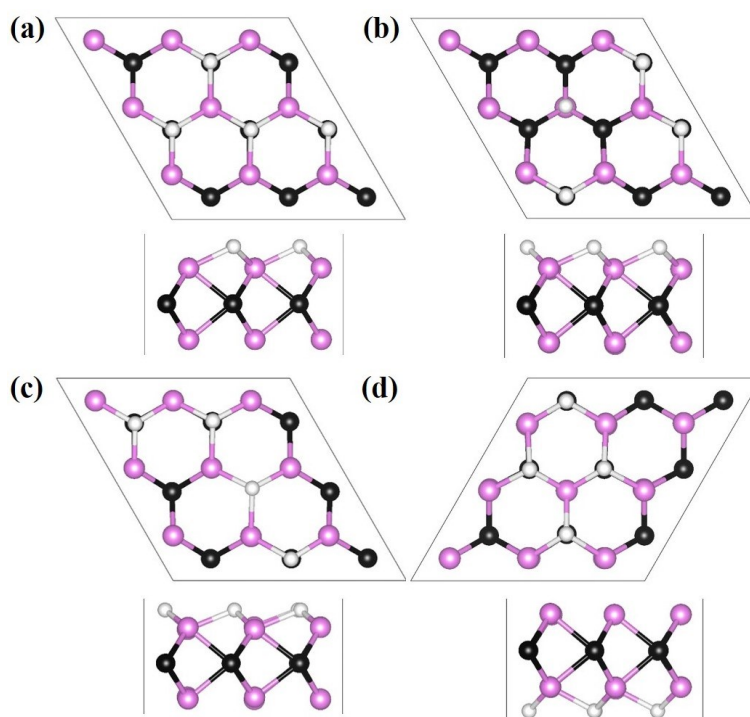

**Figure S10.** Optimized structures on pristine and vacancy defects of a 2H-Mo<sub>2</sub>C monolayer with H coverage, (a) pristine, (b) VMoS-2H, (c) V<sub>C</sub> and (d) PMoS-2H. Light purple, black and light grey balls represent Mo, C and H atoms, respectively.

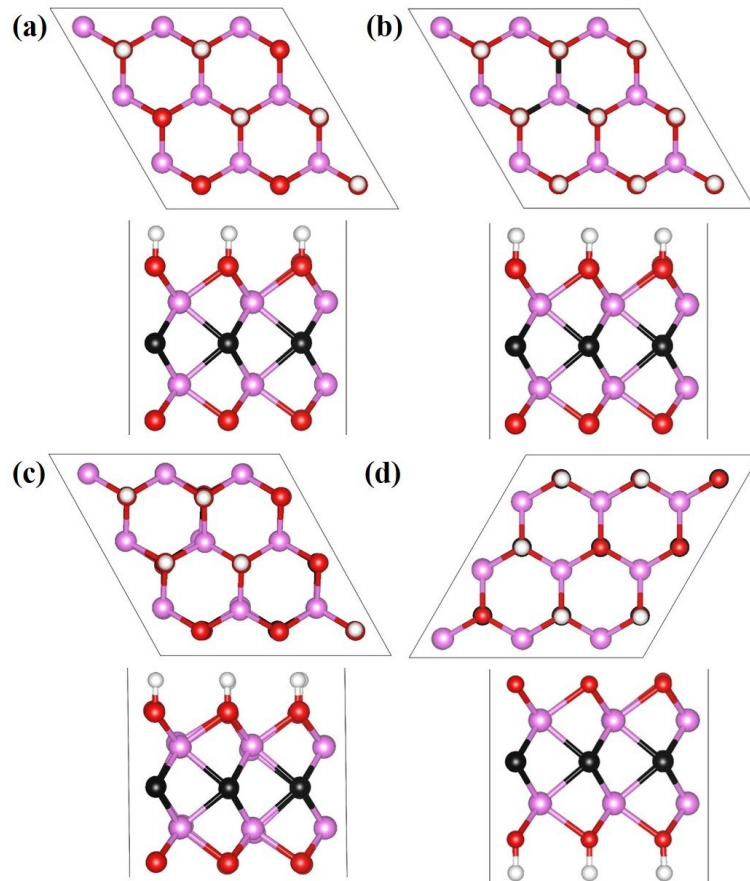

**Figure S11.** Optimized structures on pristine and vacancy defects of oxygen-terminated 2H-Mo<sub>2</sub>C monolayer with H coverage, (a) pristine, (b) VMoS-2H, (c) V<sub>C</sub> and (d) PMoS-2H. Light purple, black, red and light grey balls represent Mo, C, O and H atoms, respectively.

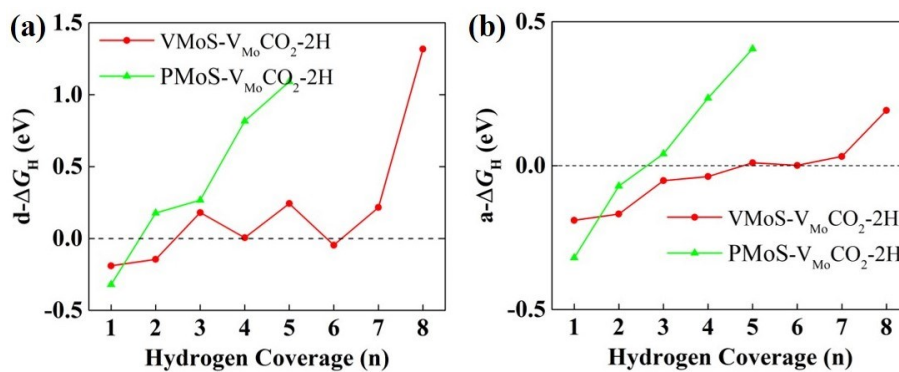

**Figure S12.** Calculated differential Gibbs free energies as a function of H coverage of Mo defective 2H-Mo<sub>2</sub>C with oxygen functionalization: (a) d- $\Delta G_H$  and (b) a- $\Delta G_H$ .



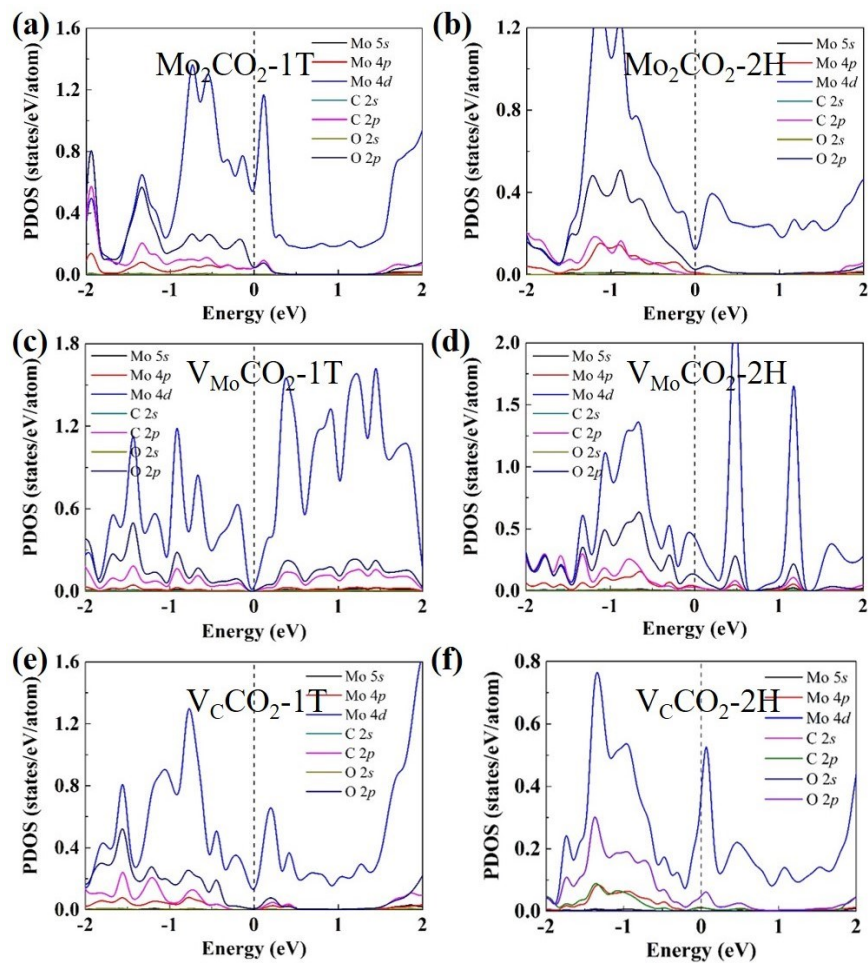

**Figure S13.** The projected density of states (PDOS) of the pristine and the 2H-Mo<sub>2</sub>C monolayer with vacancy defects and oxygen functionalization.

## Supporting Tables

**Table S1.** Calculated Gibbs free energies of different adsorption sites on the pristine and vacancy defects of 1T- and 2H-Mo<sub>2</sub>C monolayers.

| site           | 1T phase |       |       |                | 2H phase |       |       |                |
|----------------|----------|-------|-------|----------------|----------|-------|-------|----------------|
|                | Pristine | VMoS  | PMoS  | V <sub>C</sub> | Pristine | VMoS  | PMoS  | V <sub>C</sub> |
| S <sub>1</sub> | 0.007    |       |       |                |          |       |       |                |
| S <sub>2</sub> | -0.67    | -0.54 | -0.56 | -0.63          | -1.24    | -0.94 | -0.94 | -2.10          |
| S <sub>3</sub> | -0.60    | -0.68 | -0.40 | -0.55          | -1.03    | -0.86 | -0.85 | -1.05          |
| S <sub>4</sub> |          | -0.47 | -0.61 | -0.60          |          | -0.79 | -0.79 | -2.00          |
| S <sub>5</sub> |          | -0.51 | -0.57 | -0.60          |          | -0.85 | -0.85 | -2.22          |
| S <sub>6</sub> |          | 0.40  | -0.61 |                |          | 0.70  |       |                |
| S <sub>v</sub> |          |       | -0.63 | -0.86          |          |       |       | -2.22          |

**Table S2.** Calculated d- $\Delta G_H$  and a- $\Delta G_H$  (eV), respectively, for different H atoms (n) adsorbed on the 1T-Mo<sub>2</sub>C monolayer.

| n | 1T phase |       |       |       |       |       |                |       |
|---|----------|-------|-------|-------|-------|-------|----------------|-------|
|   | Pristine |       | VMoS  |       | PMoS  |       | V <sub>C</sub> |       |
| 1 | 0.007    | 0.007 | 0.40  | 0.40  | -0.40 | -0.40 | -0.55          | -0.55 |
| 2 | 0.01     | 0.01  | -0.59 | -0.09 | -0.32 | -0.36 | -0.48          | -0.52 |
| 3 | -0.02    | 0.002 | -0.40 | -0.19 | -0.23 | -0.32 | -0.47          | -0.50 |
| 4 | -1.98    | -0.49 | -0.49 | -0.27 | -0.55 | -0.37 | -0.44          | -0.49 |
| 5 | 0.04     | -0.39 | -0.30 | -0.27 | -0.51 | -0.40 | -0.52          | -0.49 |
| 6 | -1.55    | 0.02  | -0.47 | -0.31 | -0.44 | -0.41 | -0.42          | -0.48 |

**Table S3.** Calculated d- $\Delta G_H$  and a- $\Delta G_H$  (eV), respectively, for different H atoms (n) adsorbed on the oxygen-terminated 1T-Mo<sub>2</sub>C monolayer.

| n | 1T phase |       |       |       |       |       |                |       |
|---|----------|-------|-------|-------|-------|-------|----------------|-------|
|   | Pristine |       | VMoS  |       | PMoS  |       | V <sub>C</sub> |       |
| 1 | -0.69    | -0.69 | -0.10 | -0.10 | 0.10  | 0.10  | -0.33          | -0.33 |
| 2 | 0.01     | -0.34 | -0.15 | -0.12 | -0.02 | 0.04  | 0.06           | -0.13 |
| 3 | 0.08     | -0.20 | -0.12 | -0.12 | -0.34 | -0.09 | 0.29           | 0.008 |
| 4 | 0.87     | 0.07  | -0.20 | -0.14 | 0.09  | -0.09 | 0.47           | 0.12  |

|   |      |      |        |       |       |       |      |      |
|---|------|------|--------|-------|-------|-------|------|------|
| 5 | 1.63 | 0.38 | -0.002 | -0.12 | 0.05  | -0.06 | 0.71 | 0.24 |
| 6 |      |      | 0.08   | -0.08 | -0.04 | -0.06 |      |      |
| 7 |      |      | -0.71  | -0.17 | -0.08 | -0.06 |      |      |
| 8 |      |      | -0.05  | -0.16 | 0.96  | 0.07  |      |      |
| 9 |      |      | 0.19   | -0.12 | 1.17  | 0.19  |      |      |

**Table S4.** Calculated d- $\Delta G_H$  and a- $\Delta G_H$  (eV), respectively, for different H atoms (n) adsorbed on a 2H-Mo<sub>2</sub>C monolayer.

| 2H phase |          |       |       |       |       |       |                |       |
|----------|----------|-------|-------|-------|-------|-------|----------------|-------|
| n        | Pristine |       | VMoS  |       | PMoS  |       | V <sub>C</sub> |       |
| 1        | -1.03    | -1.03 | 0.70  | 0.70  | -0.79 | -0.79 | -1.05          | -1.05 |
| 2        | -0.90    | -0.97 | -2.38 | -0.84 | -0.18 | -0.49 | -0.97          | -1.01 |
| 3        | -0.77    | -0.90 | -0.46 | -0.72 | -0.65 | -0.54 | -1.66          | -1.23 |
| 4        | -0.73    | -0.86 | -0.42 | -0.64 | -0.58 | -0.55 | -0.60          | -1.07 |

**Table S5.** Calculated d- $\Delta G_H$  and a- $\Delta G_H$  (eV), respectively, for different H atoms (n) adsorbed on an oxygen-terminated 2H-Mo<sub>2</sub>C monolayer.

| 2H phase |          |       |       |        |       |       |                |        |
|----------|----------|-------|-------|--------|-------|-------|----------------|--------|
| n        | Pristine |       | VMoS  |        | PMoS  |       | V <sub>C</sub> |        |
| 1        | -0.48    | -0.48 | -0.19 | -0.19  | -0.32 | -0.32 | -0.34          | -0.34  |
| 2        | 0.06     | -0.21 | -0.15 | -0.17  | 0.18  | -0.07 | 0.05           | -0.14  |
| 3        | 0.75     | 0.11  | 0.18  | -0.05  | 0.27  | 0.04  | 0.26           | -0.009 |
| 4        | 1.63     | 0.49  | 0.005 | -0.04  | 0.82  | 0.24  | -0.13          | -0.04  |
| 5        | 1.67     | 0.73  | 0.24  | 0.01   | 1.09  | 0.41  | 1.32           | 0.23   |
| 6        |          |       | -0.05 | 0.0008 |       |       |                |        |
| 7        |          |       | 0.22  | 0.03   |       |       |                |        |
| 8        |          |       | 1.32  | 0.19   |       |       |                |        |
| 9        |          |       | 2.30  | 0.43   |       |       |                |        |

## References

- 1 H. Shu, D. Zhou, F. Li, D. Cao and X. Chen, Defect Engineering in MoSe<sub>2</sub> for the Hydrogen Evolution Reaction: From Point Defects to Edges, *ACS App. Mater. Inter.*, 2017, **9**, 42688–42698.
- 2 Y. Zhang, X. Chen, Y. Huang, C. Zhang, F. Li and H. Shu, The Role of Intrinsic Defects in Electrocatalytic Activity of Monolayer VS<sub>2</sub> Basal Planes for the Hydrogen Evolution Reaction, *J. Phys. Chem. C*, 2017, **121**, 1530–1536.
- 3 Q. Sun, Y. Dai, Y. Ma, W. Wei and B. Huang, Vertical and Bidirectional Heterostructures from Graphyne and MSe<sub>2</sub> (M = Mo, W), *J. Phys. Chem. Lett.*, 2015, **6**, 2694–2701.
- 4 Q. Sun, Y. Dai, Y. Ma, T. Jing, W. Wei and B. Huang, Ab Initio Prediction and Characterization of Mo<sub>2</sub>C Monolayer as Anodes for Lithium-Ion and Sodium-Ion Batteries, *J. Phys. Chem. Lett.*, 2016, **7**, 937–943.
- 5 D. A. Kuznetsov, Z. Chen, P. V. Kumar, A. Tsoukalou, A. Kierzkowska, P. M. Abdala, O. V. Safonova, A. Fedorov and C. R. Müller, Single Site Cobalt Substitution in 2D Molybdenum Carbide (MXene) Enhances Catalytic Activity in the Hydrogen Evolution Reaction, *J. Am. Chem. Soc.*, 2019, **141**, 17809–17816.
- 6 Q. Tang and D. E. Jiang, Mechanism of Hydrogen Evolution Reaction on 1T-MoS<sub>2</sub> from First Principles, *ACS Catal.*, 2016, **6**, 4953–4961.
- 7 Y. Shao, M. Shao, Y. Kawazoe, X. Shi and H. Pan, Exploring New Two-Dimensional Monolayers: Pentagonal Transition Metal Borides/Carbides (Penta-TMB/Cs), *J. Mater. Chem. A*, 2018, **6**, 10226–10232.
- 8 H. Wu, X. Li, R. Zhang and J. Yang, Proposal of a Stable B<sub>3</sub>S Nanosheet as an Efficient Hydrogen Evolution Catalyst, *J. Mater. Chem. A*, 2019, **7**, 3752–3756.
- 9 X. Lv, W. Wei, P. Zhao, D. Er, B. Huang, Y. Dai and T. Jacob, Oxygen-Terminated BiXenes and Derived Single Atom Catalysts for the Hydrogen Evolution Reaction, *J. Catal.*, 2019, **378**, 97–103.
